# Supplementary material
Source: publisher figshare collection journal article supplement (https://karger.figshare.com/ndownloader/files/28840035)
Supplement: Supplementary file 1 [file 28840035]

**Supplemental File 4. Detailed flowchart of abstract and article review**

**Abstract Screen**

Reviewer: CM

PubMed: 20/233

OVID: 0/0

Cochrane: 3/40

Google Scholar: 3/200

Snowballing: 10 articles

(Selected abstracts out of total)

**Abstract Screen**

Reviewer: SZ

PubMed: 16/233

OVID: 0/0

Cochrane: 3/40

Google Scholar: 3/200

Snowballing: 10 articles

(Selected abstracts out of total)

**Abstract Screen (3rd Investigator: AM)**

PubMed: Same articles: 14

SZ: 2 articles that CM did not include, AM included both. CM: 6 articles that SZ did not include, AM included 3/6.

OVID, Cochrane, and google scholar: no differences.

**Full Article Review**

Full text articles reviewed after duplicate removal: 29

CM: 12/29 selected for inclusion

SZ: 13/29 selected for inclusion

AM: Agreed on 11/29, excluded 1 article from CM and 2 articles from SZ
